# Supplementary material for: Pancreatic Ppy-expressing γ-cells display mixed phenotypic traits and the adaptive plasticity to engage insulin production
Source: PubMed Central journal article supplement (PMC8298494; doi:10.1038/s41467-021-24788-0), 2021-07-22
Supplement: 41467_2021_24788_MOESM1_ESM.pdf [file 41467_2021_24788_MOESM1_ESM.pdf]

**Pancreatic Ppy-expressing  $\gamma$ -cells display mixed phenotypic traits and have adaptive plasticity to engage insulin production**

Marta Perez-Frances<sup>1</sup>, Léon van Gurp<sup>1</sup>, Maria Valentina Abate<sup>1</sup>, Valentina Cigliola<sup>1,2</sup>, Kenichiro Furuyama<sup>1,3</sup>, Eva Bru-Tari<sup>1</sup>, Daniel Oropeza<sup>1</sup>, Taïna Carreaux<sup>1</sup>, Yoshio Fujitani<sup>4</sup>, Fabrizio Thorel<sup>1</sup> and Pedro L. Herrera<sup>1,\*</sup>

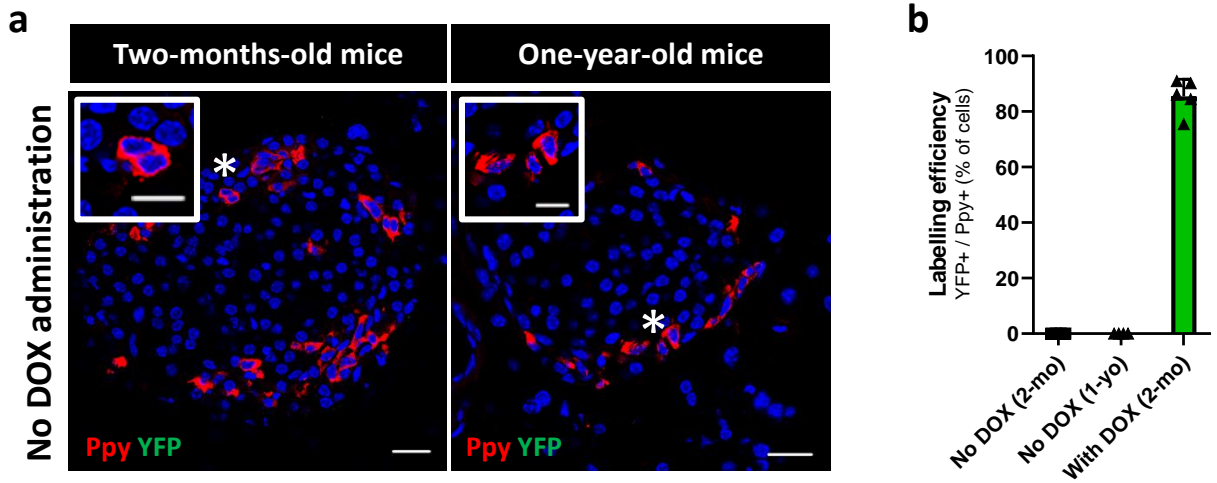

Supplementary Figure 1. **Inducible Ppy-YFPi lineage-tracing.** **a**, No YFP labelling is observed in untreated two-month-old and one-year-old mice. Immunofluorescence: Ppy, red; YFP, green. Scale bars: 20µm (10µm in insets). **b**, Percentage of Ppy-expressing cells labelled with YFP with or without DOX treatment. No DOX (2-month-old mice): 0,0 ± 0,0; n=4, 1458 Ppy<sup>+</sup> cells scored. No DOX (1-year-old mice): 0,0 ± 0,0; n=4, 696 Ppy<sup>+</sup> cells scored. With DOX treatment (2-month-old mice): 84,9 ± 0,0; n=8, 5411 Ppy<sup>+</sup>YFP<sup>+</sup> out of the 6389 Ppy<sup>+</sup> cells scored. Error bars are s.e.m. Region of the pancreas: Ventral. Source data are provided as Source Data file (table a, b).

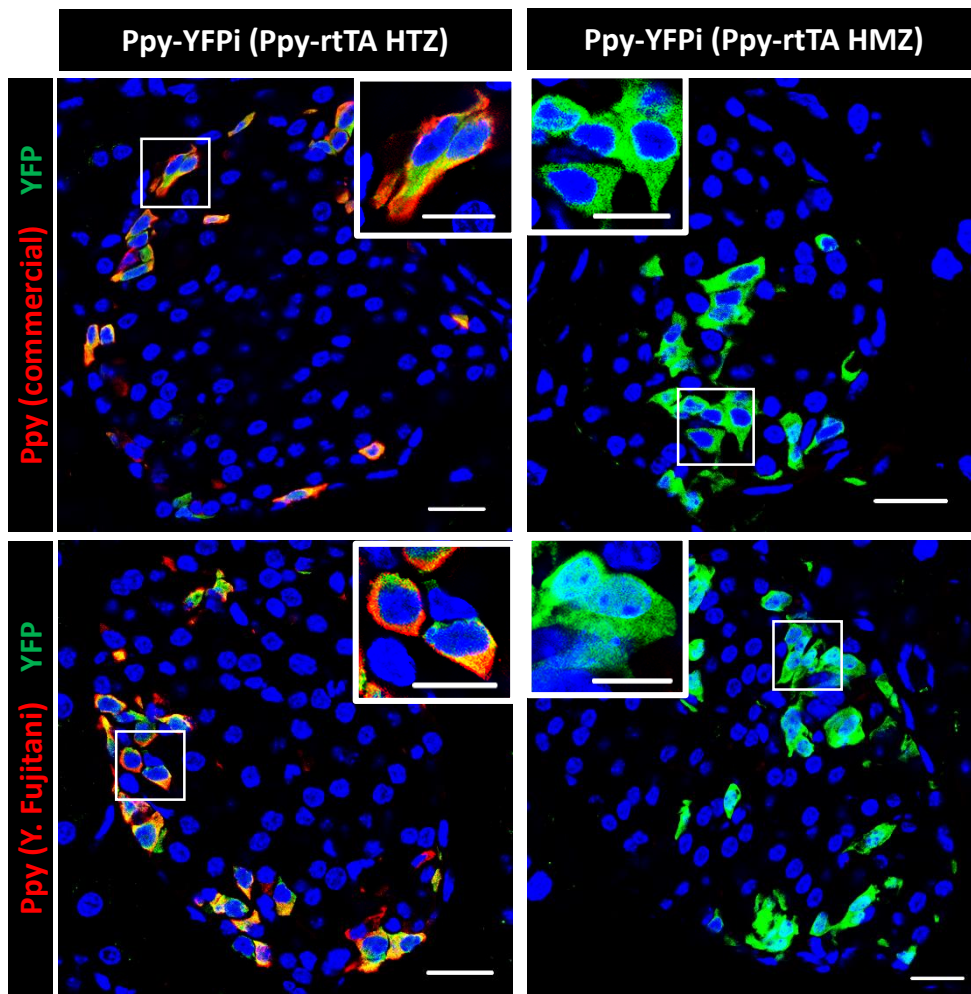

Supplementary Figure 2. **Validation of the anti-Ppy antibodies.** Representative islet from a 2-month-old DOX-treated Ppy-YFPi mouse bearing Ppy-rtTA transgene in heterozygous (HTZ) or homozygous (HMZ) state. Ppy staining (using both anti-Ppy antibodies, red) is lost in YFP (green)-labelled cells from Ppy-rtTA HMZ mice. Any of the YFP-labelled cell in DOX-treated Ppy-rtTA HMZ mice is stained with Ppy hormone. Scale bars: 20µm (10µm in insets). Region of the pancreas: Ventral.

**a**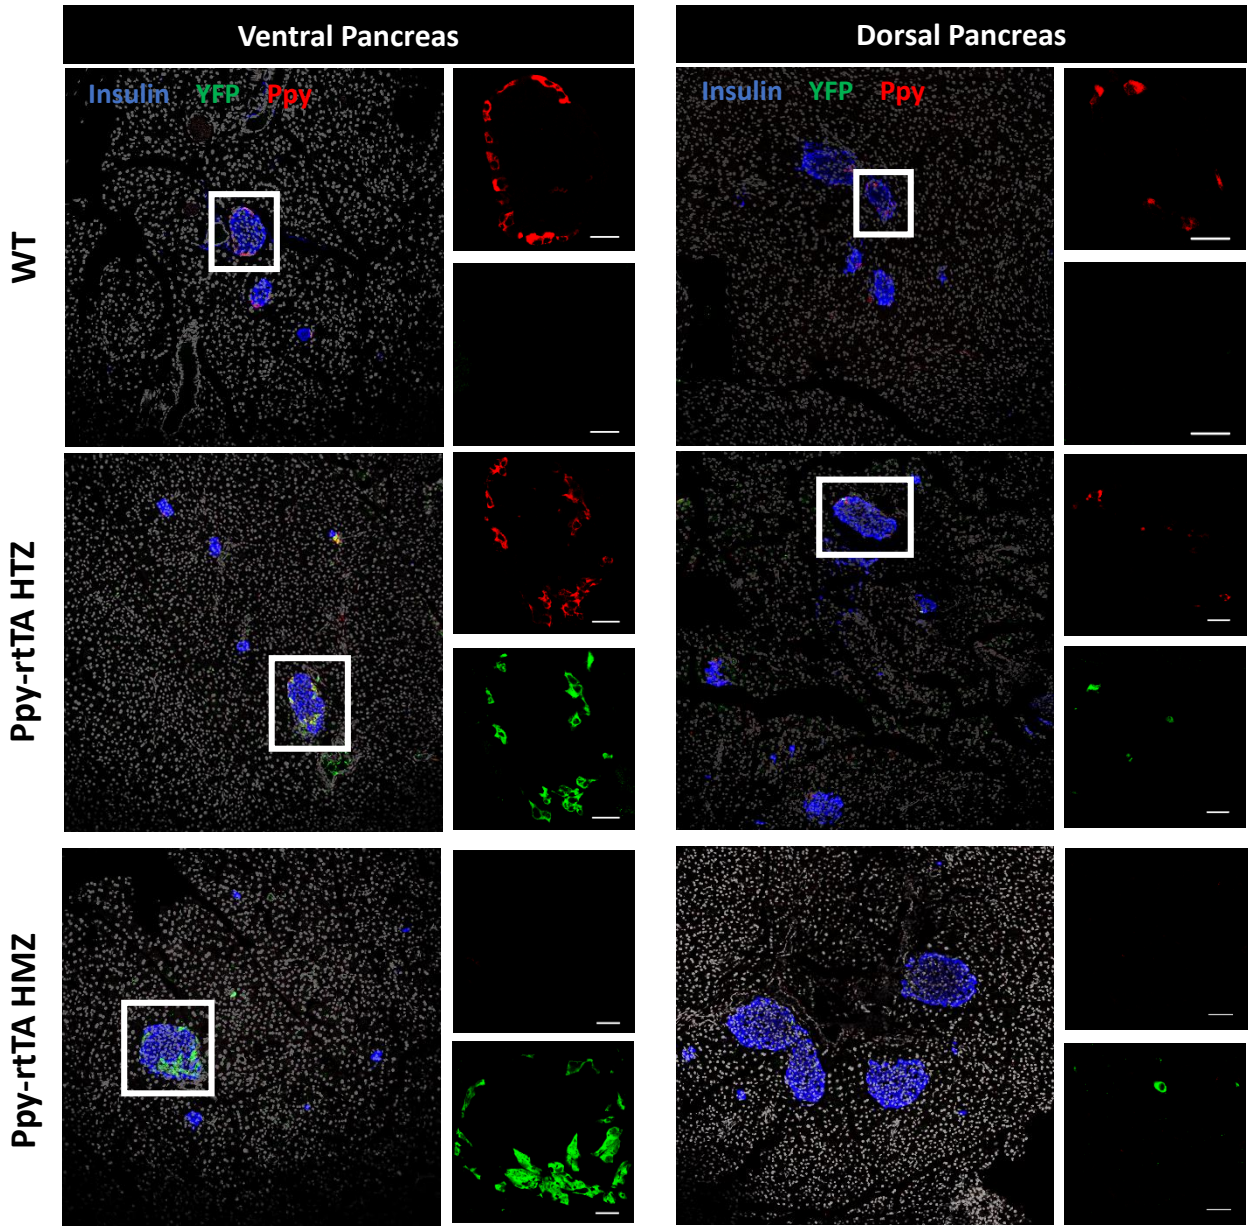**b**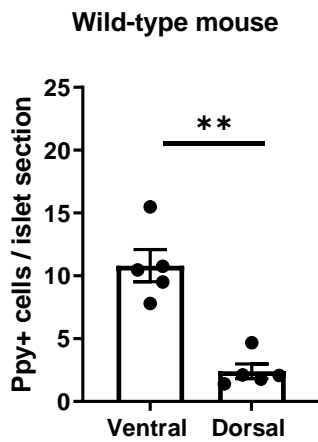**c**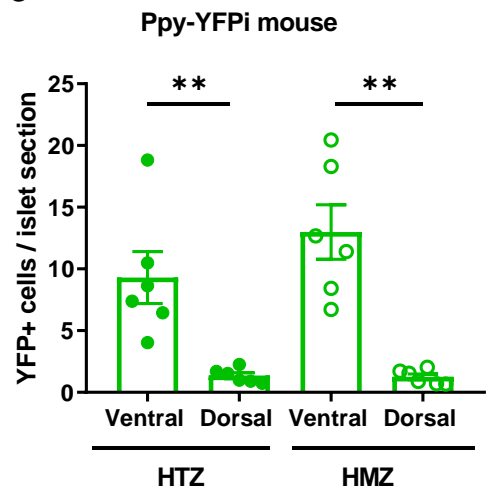

Supplementary Figure 3.  **$\gamma$ -cell distribution in the pancreas of wild-type and Ppy-YFPi mice.** **a**, YFP-traced  $\gamma$ -cells in Ppy-rtTA heterozygous (HTZ) and homozygous (HMZ) mice follow the same distribution pattern than wild-type mice, being predominantly located in the ventral region of the pancreas. Comparative immunofluorescence of ventral and dorsal pancreatic sections: Ppy, red; YFP, green; Insulin, blue. Scale bar: 40 $\mu$ m (section) or 20 $\mu$ m (islet). **b-c**, Quantification of Ppy<sup>+</sup> (**b**) or YFP<sup>+</sup> (**c**) cells per islet section in ventral and dorsal sections of wild-type and Ppy-rtTA HTZ and HMZ, respectively. WT mice (n=5 mice, 5768 and 1288 Ppy+ cells scored in ventral and dorsal regions, respectively), Ppy-rtTA HTZ (n=6 mice, 3482 and 1017 YFP+ cells scored in ventral and dorsal regions, respectively) and Ppy-rtTA HMZ (n=6 mice, 3731 and 428 YFP+ cells scored in ventral and dorsal regions, respectively). Data is presented as mean values  $\pm$  s.e.m. Two-tailed Mann-Whitney test (ns p>0.05; \* p $\leq$ 0.05; \*\* p $\leq$ 0.01; \*\*\* p $\leq$ 0.001); wild-type ventral versus dorsal: *P* value = 0.0079, Ppy-YFPi (HTZ) ventral versus dorsal: *P* value = 0.0022, Ppy-YFPi (HMZ) ventral versus dorsal: *P* value = 0.0022. Source data are provided as Source Data file (table c).

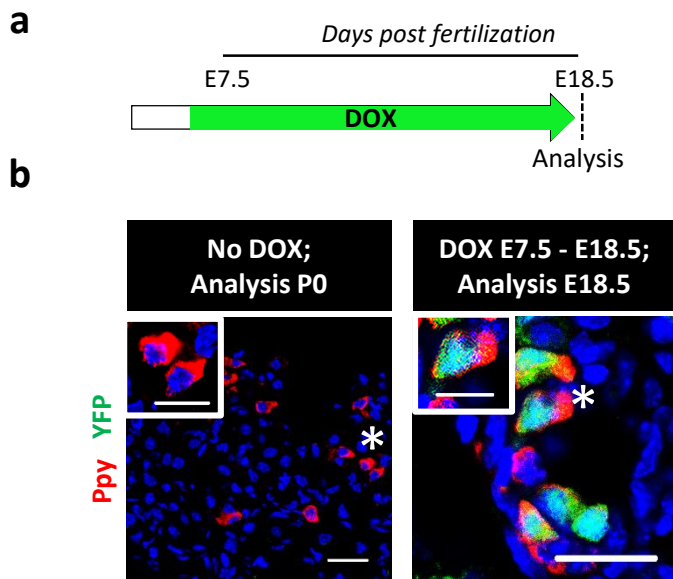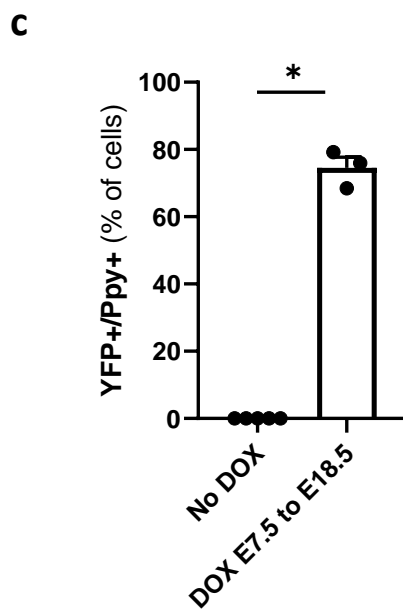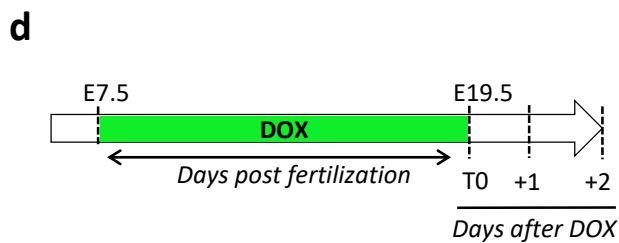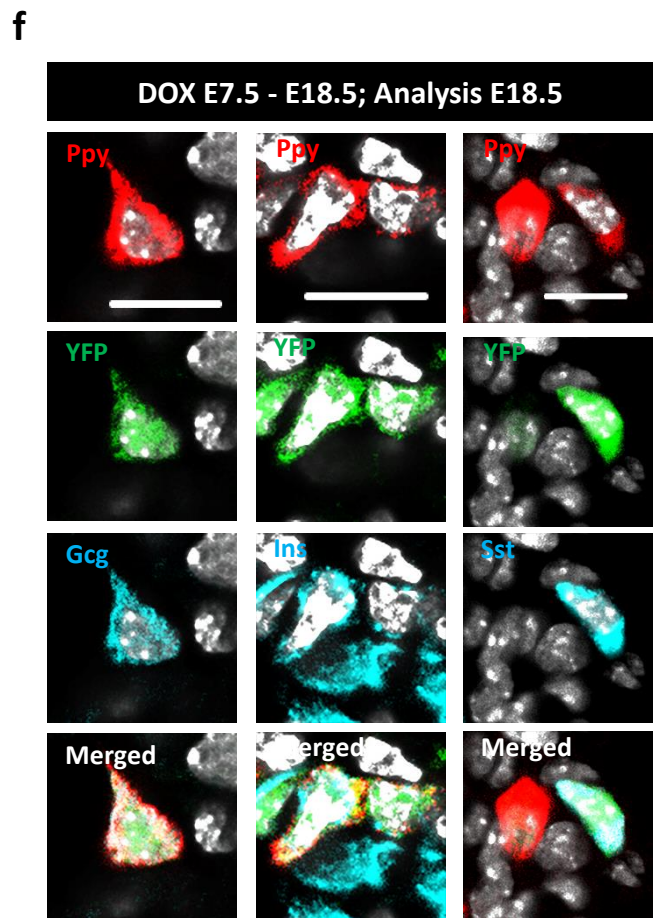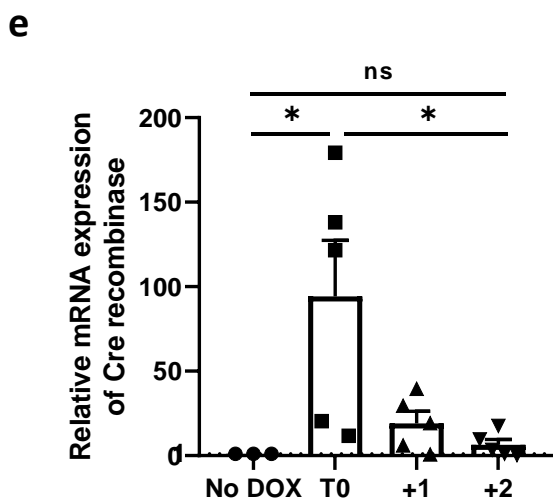

Supplementary Figure 4. **The Ppy-YFPi model is suitable for studying the adult Ppy-cell origin in embryonic stages.** **a**, Experimental design. **b**, Representative pictures of No DOX (control) and DOX E7.5-E18.5. Immunofluorescence: Ppy in red and YFP in green. **c**, Proportion of Ppy<sup>+</sup> cells YFP-labelled. YFP-traced  $\gamma$ -cells are only present upon DOX administration. No DOX (n=5 mice; 0 Ppy+YFP+ out of 2515 Ppy+ cells scored) and DOX E7.5 to E18.5 (n=3 mice, 378 Ppy+YFP+ out of 492 Ppy+ cells scored). Two-tailed Mann-Whitney test, No DOX vs DOX E7.5 to E18.5 P value = 0.0179. **d**, Experimental protocol. DOX administration from E7.5 to E19.5 to pregnant females (T0: under DOX exposure, +1: one day after DOX removal, +2: 2 days after DOX removal). **e**, Relative mRNA expression of *Cre* recombinase normalized on Ppy expression at different DOX administration timings (no DOX, n=3 mice; T0, n=5 mice; +1, n=5 mice; +2, n=5 mice). Data are shown as fold change of normalized ct values relative to No DOX (No DOX = 1). Two-tailed Mann-Whitney test (ns p>0.05; \* p≤0.05; \*\* p≤0.01; \*\*\* p≤0.001), No DOX versus T0: P value = 0.0357, T0 versus +2: P value = 0.0159, No DOX versus +2: P value = 0.25. **f**. Bihormonal YFP-labelled Ppy-expressing cells were detected at E18.5 (Ppy, red; YFP, green and Gcg, cyan). Scale bars: 20 $\mu$ m (10 $\mu$ m in insets). Data is presented as mean values  $\pm$  s.e.m. Region of the pancreas: whole pancreas. Source data are provided as Source Data file (table d).

**a**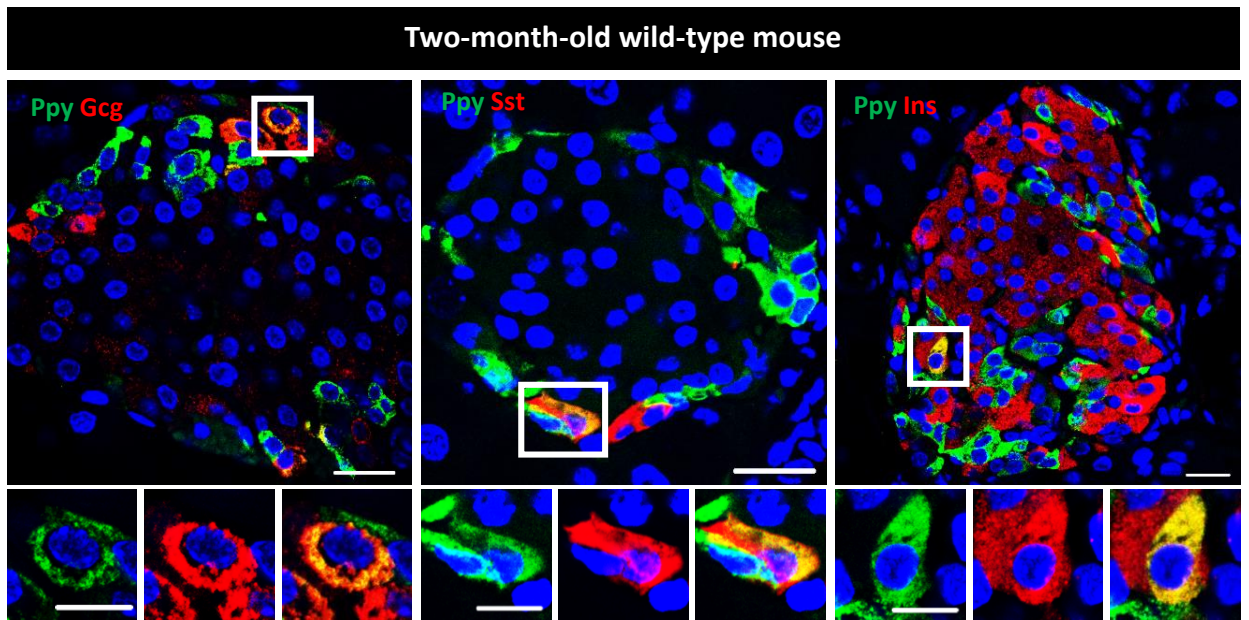**b**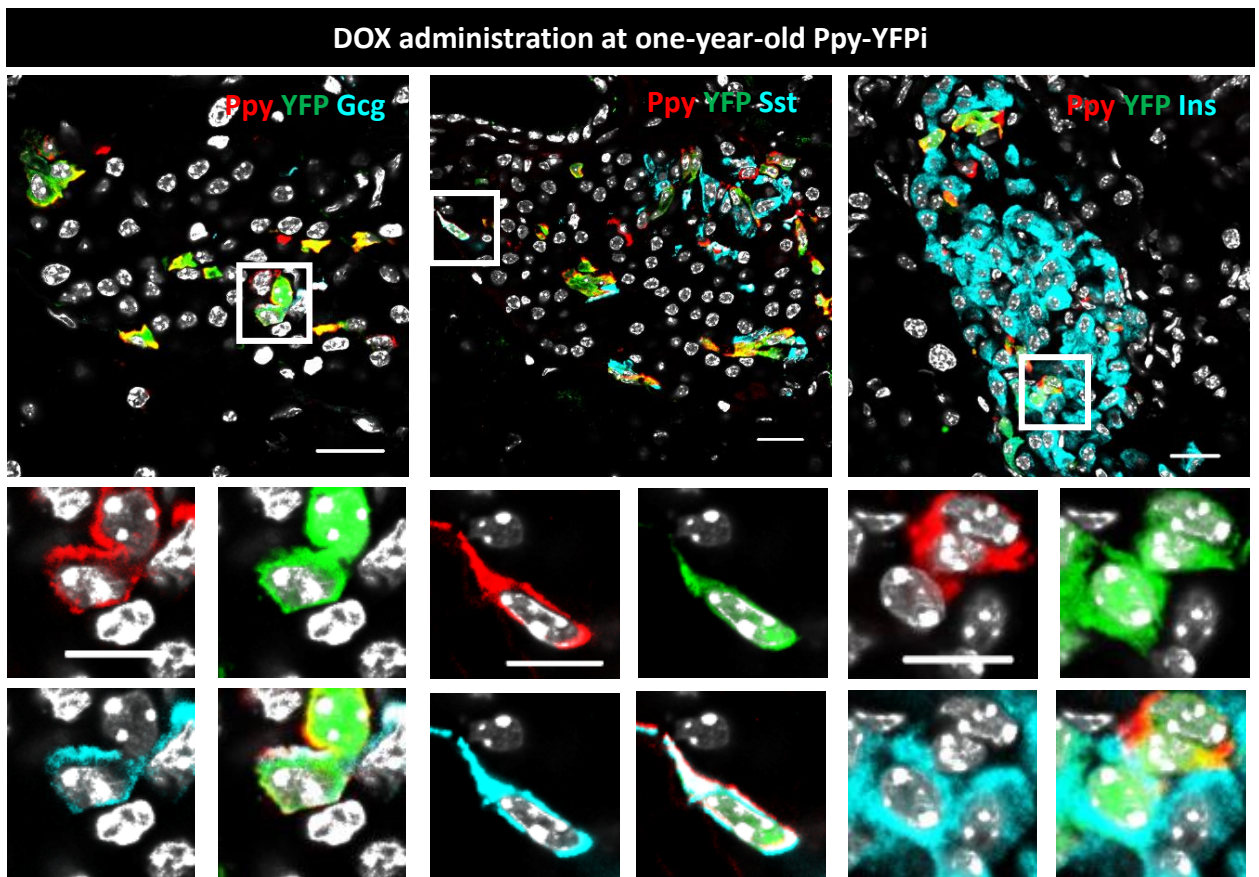

Supplementary Figure 5.  $\gamma$ -cell heterogeneity in wild-type mice persist throughout life. **a**, Bihormonal Ppy<sup>+</sup>Gcg<sup>+</sup> (left; Ppy: green and Gcg: red), Ppy<sup>+</sup>Sst<sup>+</sup> (middle; Ppy: green and Sst: red) and Ppy<sup>+</sup>Ins<sup>+</sup> (right; Ppy: green and Ins: red) were detected in 2-month-old wild-type mice (n=5 mice). **b**, Heterogeneity in  $\gamma$ -cell population is maintained in one-year-old Ppy-YFPi mice (n=4 mice). Bihormonal Ppy<sup>+</sup>Gcg<sup>+</sup> (left; Ppy: red and Gcg: cyan), Ppy<sup>+</sup>Sst<sup>+</sup> (middle; Ppy: red and Sst: cyan) and Ppy<sup>+</sup>Ins<sup>+</sup> (right; Ppy: red and Ins: cyan) YFP (green)-labelled could be identified. Scale bars: 20 $\mu$ m (10 $\mu$ m in insets). Region of the pancreas: Ventral. Source data are provided as Source Data file (table f).



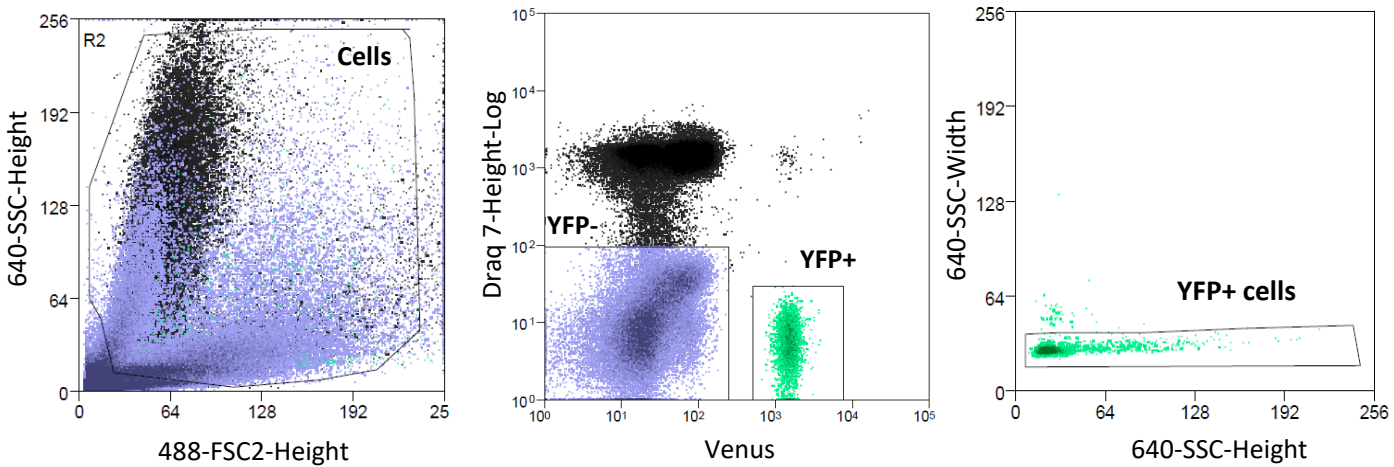

Supplementary Figure 6. **Gating strategy used for FACS sorting the YFP-labelled Ppy-expressing cells for RNA-seq analysis.** Representative FACS plots for Fig. 4-5.

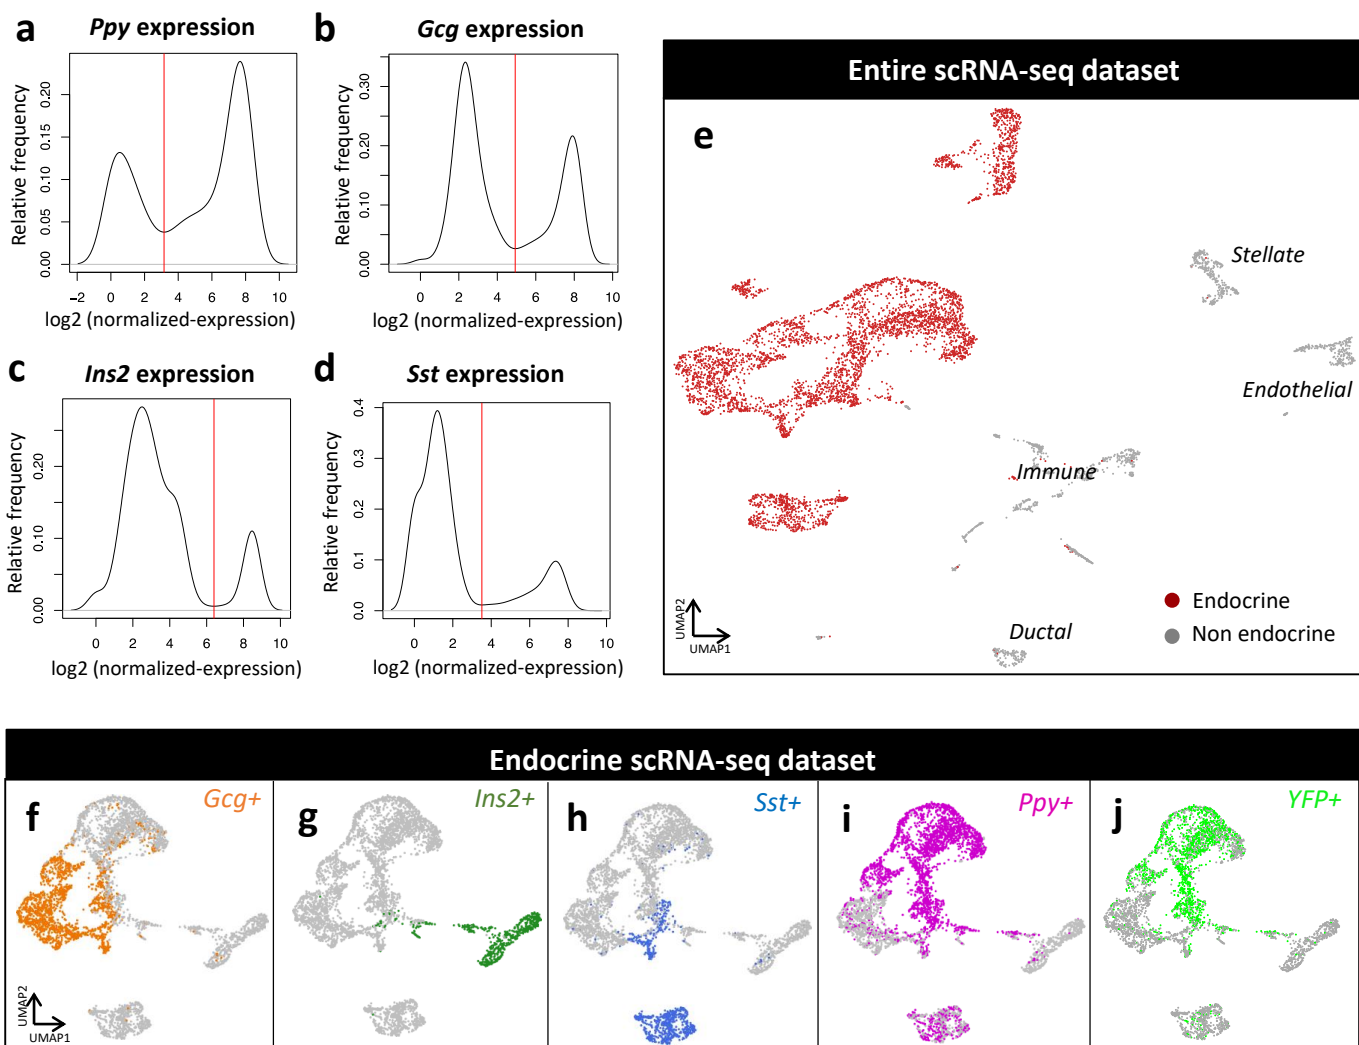

Supplementary Figure 7. **Single-cell transcriptomics of Ppy-YFPi islets.** **a-d**, Density plots of *Ppy* (**a**), *Gcg* (**b**), *Ins2* (**c**) and *Sst* (**d**) expression using normalized data from Ppy-YFPi islets. Red line indicates the threshold to define hormone<sup>+</sup> cells. **e**, UMAP representation of all cells included in the Ppy-YFPi dataset (n=4261 cells). Red dots illustrate the endocrine population, grey dots represent all non-endocrine populations. **f-j**, UMAP representation of hormone positive cells: *Gcg*<sup>+</sup> (orange, n=1367 cells, **f**), *Ins2*<sup>+</sup> (green, n=548 cells, **g**), *Sst*<sup>+</sup> (blue, n=624 cells, **h**) and *Ppy*<sup>+</sup> (magenta, n=2626 cells, **i**) and *YFP*<sup>+</sup> (fluor-green, n=1537 cells, **j**). Source data are provided as Source Data file (table g).

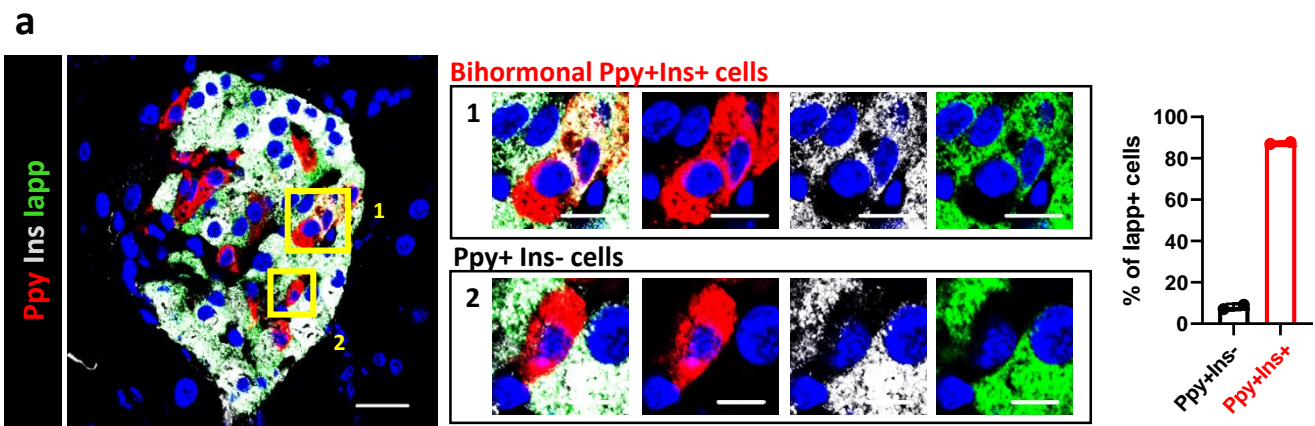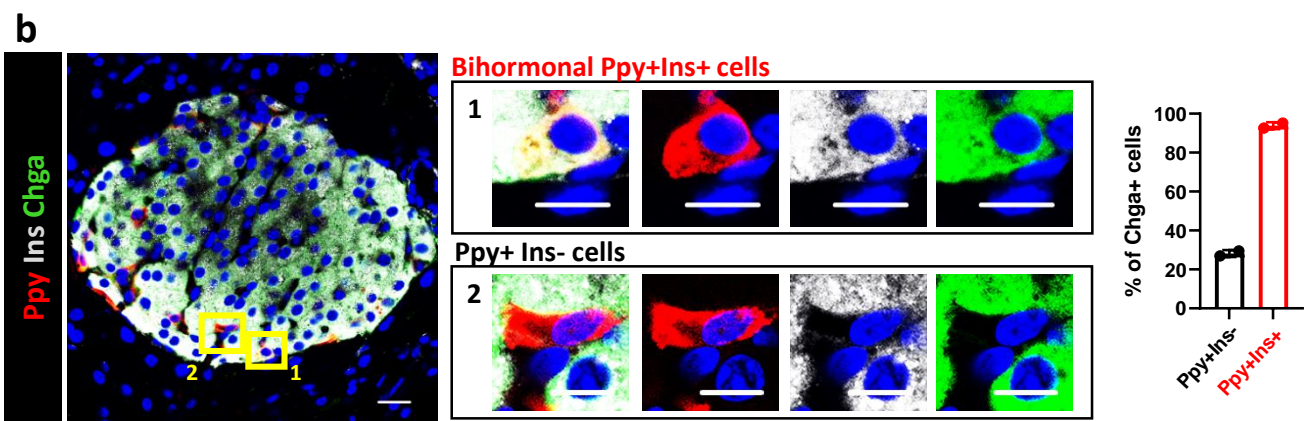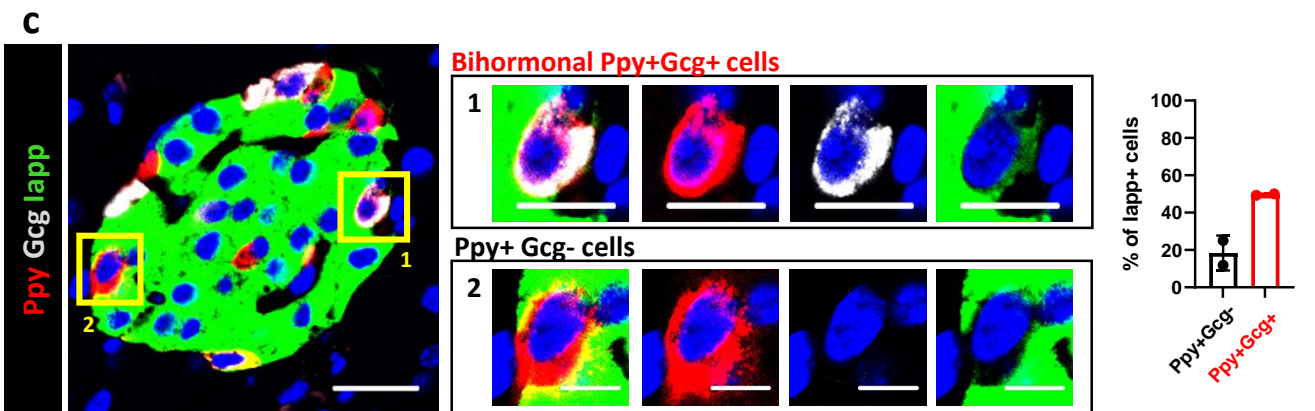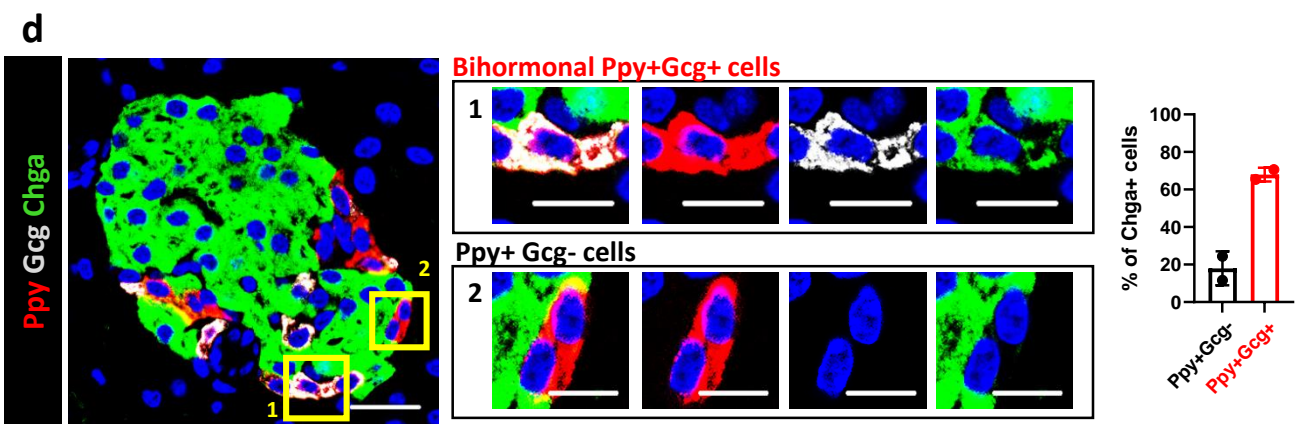

Supplementary Figure 8. **Protein validation of the bihormonal Ppy-expressing cell identity. a-d,** An enrichment in the production of Chga (**b, d**) and lapp (**a, c**) was observed and quantified in bihormonal Ppy+Ins+ (**a, b**) and Ppy+Gcg+ (**c, d**) in wild-type mice (n=2 mice). Scale bar: 20µm (islet) or 10µm (cell). Percentage of Chga+ (**b, d; right pannel**) and lapp+ (**a, c; right pannel**) cells in bihormonal Ppy+Ins+ and Ppy+Gcg+ compared to Ppy+Ins- and Ppy+Gcg- cells, respectively. 49 out of the 56 and 64 out of 68 Ppy+Ins+ cells expressed lapp and Chga, respectively; compared to the 50 out of 617 and 234 out of 839 Ppy+Ins- cells that express lapp and Chga, respectively. Similarly, 181 out of the 365 and 133 out of 198 Ppy+Gcg+ cells expressed lapp and Chga, respectively; compared to the 122 out of 671 and 87 out of 520 Ppy+Gcg- cells that express lapp and Chga, respectively. Ppy (a-d): red, Ins (a,b)/Gcg (c,d): grey and lapp (a,c)/ChgA (b,d): green. Region of the pancreas: Ventral. Data is presented as mean values  $\pm$  s.d. See Source data are provided as Source Data file (table m).

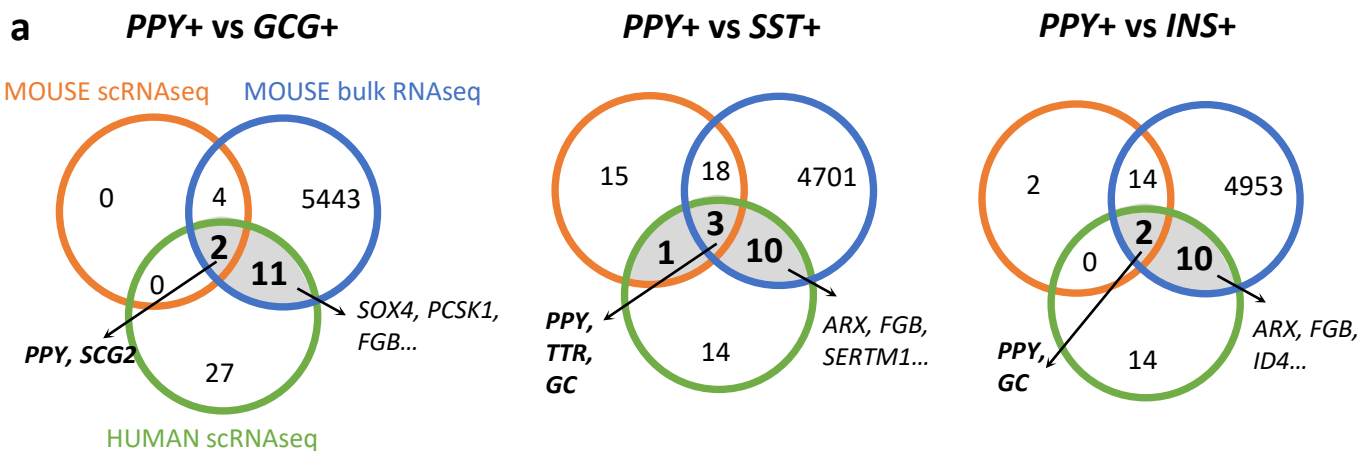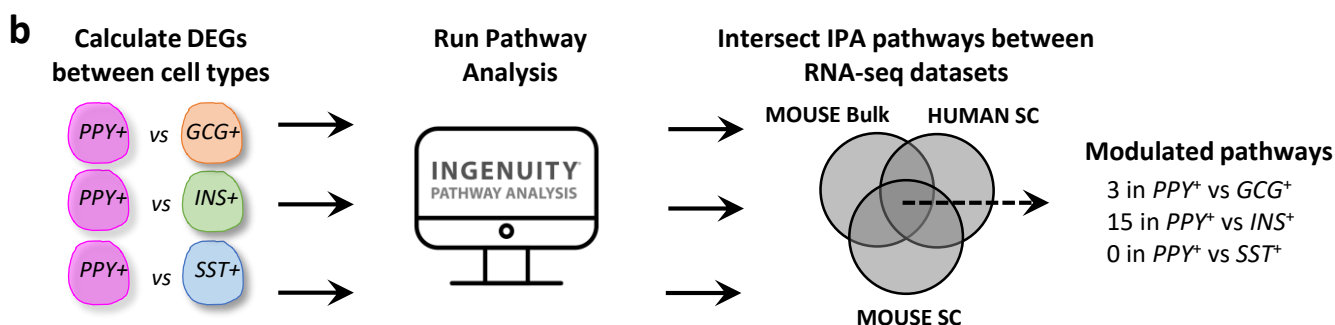

**c** *PPY+* vs *GCG+*

| Modulated Pathway (3) / State                              |           |
|------------------------------------------------------------|-----------|
| Role of PKR in Interferon Induction and Antiviral Response | Activated |
| Aryl Hydrocarbon Receptor Signaling                        | Activated |
| PI3K/AKT Signaling                                         | Inhibited |

**d** *PPY+* vs *INS+*

| Modulated Pathway (15) / State              |           |
|---------------------------------------------|-----------|
| Necroptosis Signaling Pathway               | Inhibited |
| RhoA Signaling                              | Inhibited |
| Regulation of Actin-based Motility by Rho   | Inhibited |
| Remodeling of Epithelial Adherens Junctions | Inhibited |
| ILK Signaling                               | Inhibited |
| PI3K/AKT Signaling                          | Inhibited |
| Aryl Hydrocarbon Receptor Signaling         | Inhibited |
| Protein Kinase A Signaling                  | Inhibited |
| AMPK Signaling                              | Inhibited |
| Myc Mediated Apoptosis Signaling            | Inhibited |
| p53 Signaling                               | Inhibited |
| Cardiac $\beta$ -adrenergic Signaling       | Inhibited |
| BAG2 Signaling Pathway                      | Inhibited |
| PPAR $\alpha$ /RXR $\alpha$ Activation      | Activated |
| PPAR Signaling                              | Activated |

Supplementary Figure 9. **Common transcriptomic identities between mouse and human  $\gamma$ -cells.** **a**, Common DEGs between PPY+ cells and each of the other endocrine cells in mouse and human. **b**, Experimental workflow to define  $\gamma$ -ID pathways using the mouse and human RNA-seq datasets. **c-d**, 3 and 15 differentially modulated pathways in  $\gamma$ -cells were identified when compared to  $\alpha$ -(**c**) and  $\beta$ -cells (**d**), respectively, in both the murine and the human RNA-seq datasets. No commonly modulated pathway were identified in the Ppy cell population compared to and  $\delta$ -cells (**b**) between mice and humans. The top modulated pathways are ranked based on Z-score. Activated pathways (orange), inhibited pathways (blue). Source data are provided as Source Data file (table o, p).

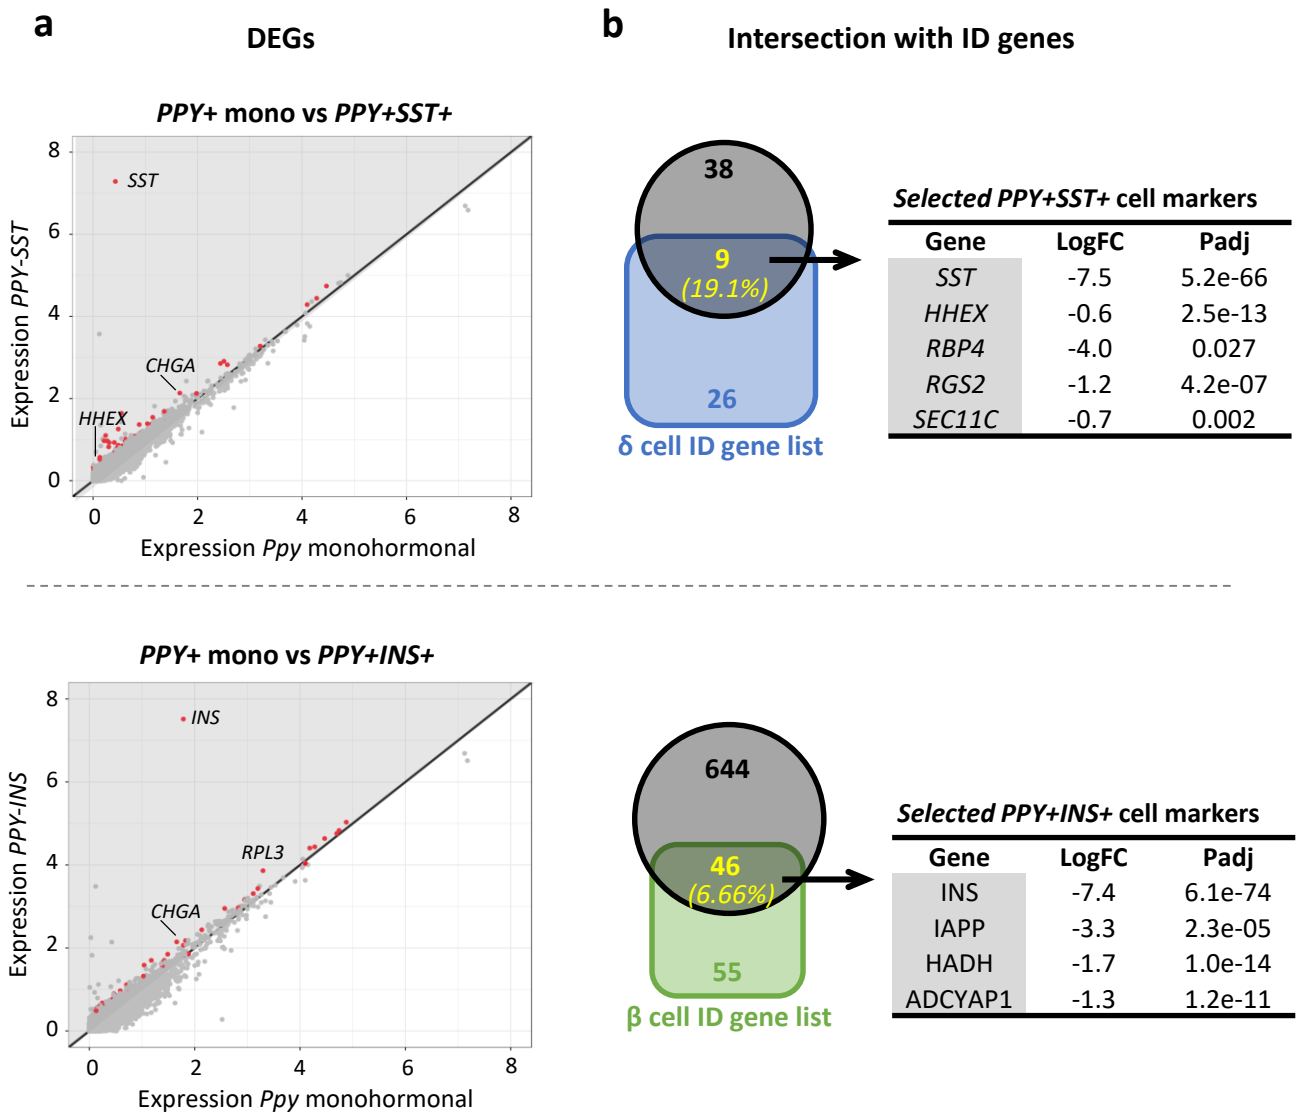

Supplementary Figure 10. **Transcriptomic profile of human bihormonal *PPY-SST* and *PPY-INS* cells.** **a**, Expression plot of differentially expressed genes (DEGs) between bihormonal *PPY-SST* (top) and *PPY-INS* (bottom) compared to monohormonal PPY-expressing cells in human. Each dot represents one gene. Black dots represent the genes with a *P* value >0.05, red dots represent the genes with *P* value <0.05. Gene names label the top DEGs. Grey area indicates the upregulated genes in each bihormonal population. Differential expression was calculated using a negative binomial generalized linear model in a pairwise manner between populations, taking along the number of UMIs and the number of genes as variables to regress. *P*-values (in panel **b** and Source Data s) are Bonferroni corrected based on the total number of genes in each dataset. **b**, Intersection of the upregulated genes in *PPY+SST+* (top) and *PPY+INS+* (bottom) from **a**, with human  $\delta$ - and  $\beta$ -cell ID gene lists. All bihormonal *PPY*-expressing cell types share important markers with adult  $\delta$ -cells (9 out of 47) and  $\beta$ -cells (46 out of 690). Source data are provided as Source Data file (table s).

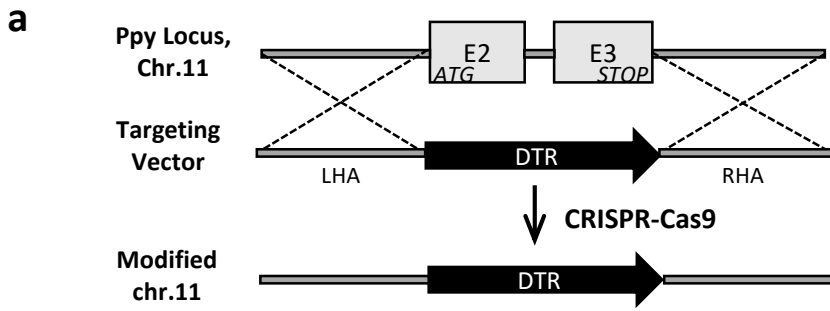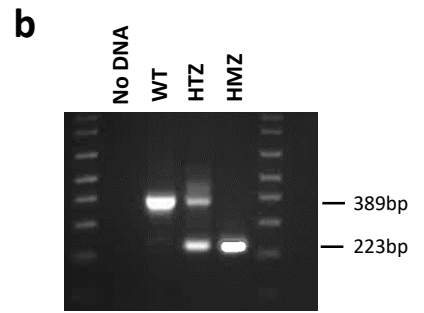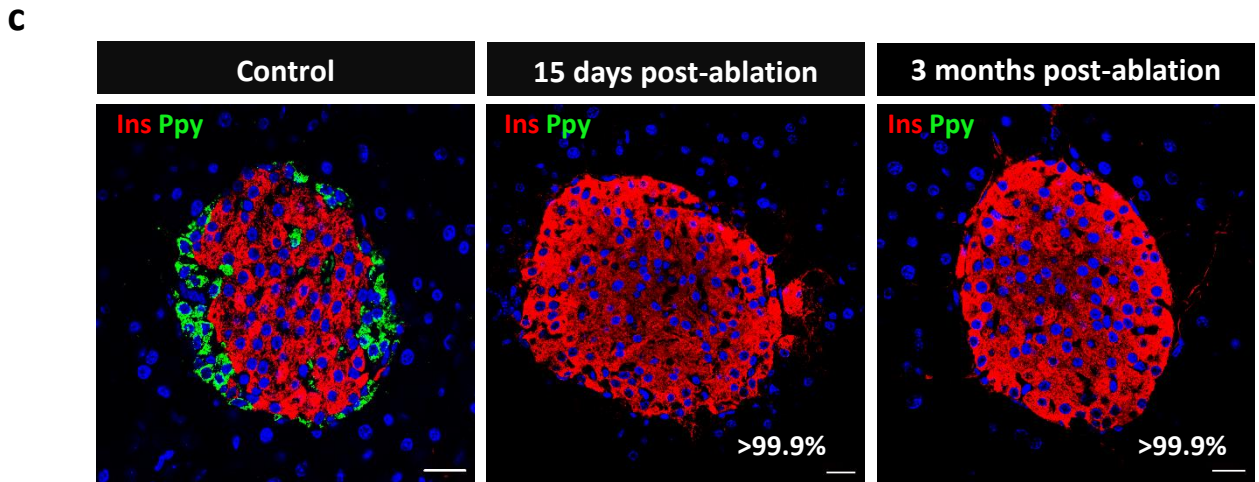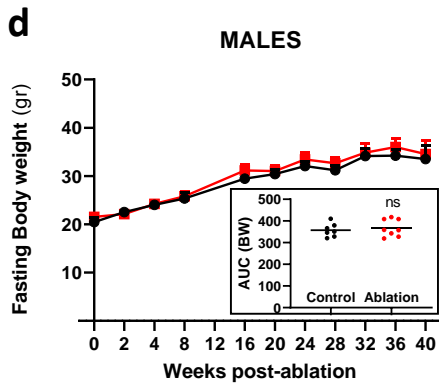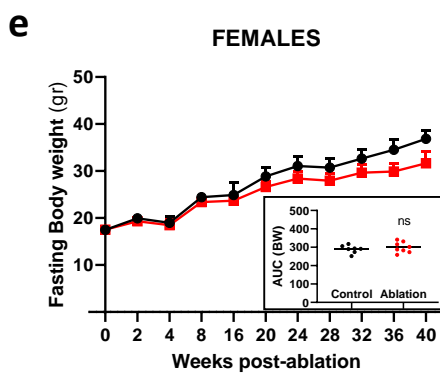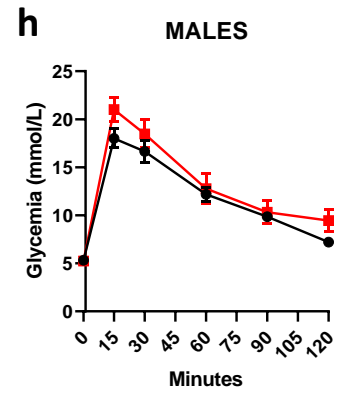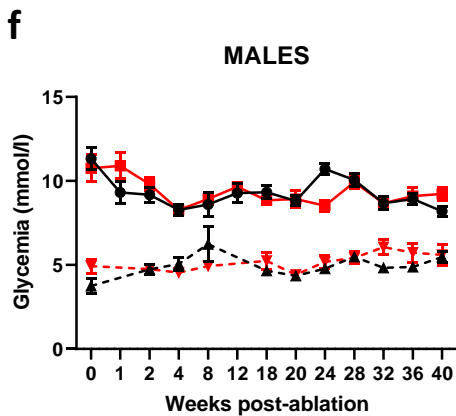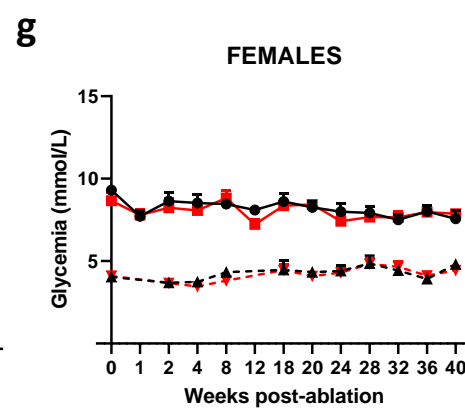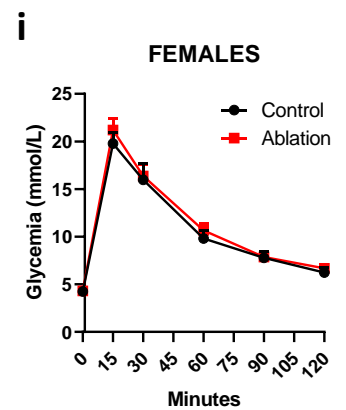



Supplementary Figure 11. **Ppy-expressing  $\gamma$ -cell ablation has no impact on body weight and glycemia.** **a**, CRISPR-Cas9 strategy to replace the Ppy coding sequence from chromosome 11 by the DTR (diphtheria toxin receptor) sequence. LHA, left homology arm; RHA, right homology arm. **b**, PCR products of wild-type (WT), Ppy-DTR heterozygous (HTZ) and Ppy-DTR homozygous (HMZ) mice (WT band: 389bp; KI band: 223bp). No DNA corresponds to the negative control. In all subsequent experiments, only Ppy-DTR heterozygous (HTZ) were used. **c**, Ppy-expressing cells were efficiently ablated 15 and 3 months post-DT injection (Ppy: green; Ins: red). Region of the pancreas: Ventral. Scale bar: 20 $\mu$ m. No DT (n=9 mice, 3656 Ppy+ cells scored), 15 days post-ablation (n=7 mice, 2 Ppy+ cells scored) and 3 months post-ablation (n=5 mice, 7 Ppy+ cells scored). **d-e**, Fasting body weight curves in non-ablated Ppy-DTR controls (black) and Ppy-cell ablated (red) males (**d**) and females (**e**) mice. Area under de curve (AUC) of each genotype is shown in the bottom right panel. **f-g**, Glycemia curves in non-ablated Ppy-DTR controls (black) and Ppy-cell ablated (red) males (**f**) and females (**g**) mice. Solid line represents random fed glycemia values, dashed line represents fasting glycemia values. Body weight and glycemia values were obtained from the same mice. Males: controls, n=7 mice; ablated, n=8 mice. Females: controls, n=9 mice; ablated, n=12 mice. **h-i**, Intraperitoneal glucose tolerance test to six months post-ablation Ppy-DTR mice (red) compared to non-injected controls (black) males (**h**) and females (**i**) mice. Males: controls, n=7 mice; ablated, n=7 mice. Females: controls, n=8 mice; ablated, n=12 mice. Data is presented as mean values  $\pm$  s.e.m. Two-tailed Mann-Whitney test (ns  $p>0.05$ ; \*  $p\leq 0.05$ ; \*\*  $p\leq 0.01$ ; \*\*\*  $p\leq 0.001$ ). Source data are provided as Source Data file (table v).

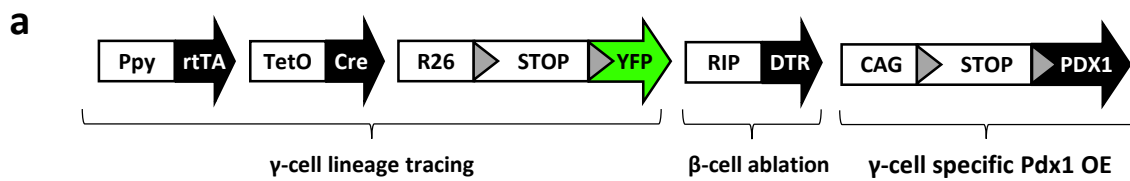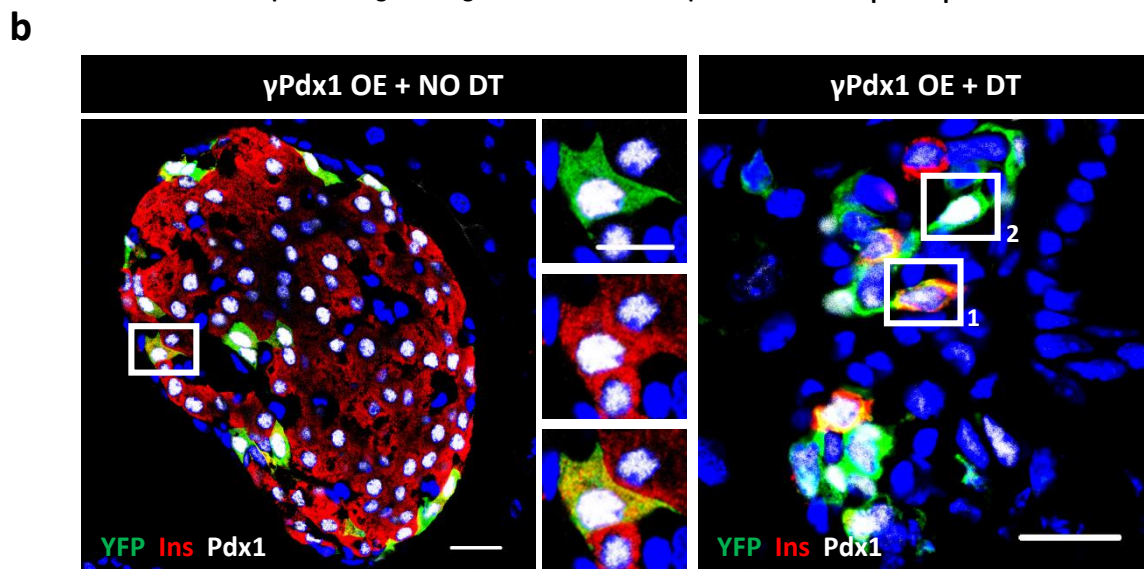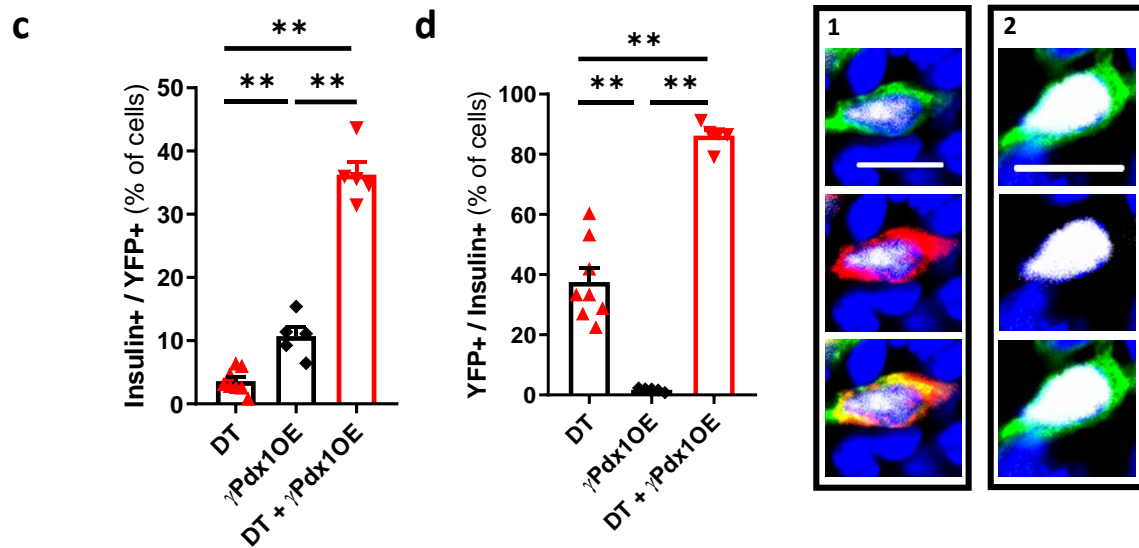

Supplementary Figure 12. **Synergistic  $\gamma$ -cell reprogramming by inducing Pdx1 expression and ablating  $\beta$ -cells.** **a**, Transgenes required for  $\gamma$ -cell lineage tracing and ectopic Pdx1 expression combined with  $\beta$ -cell ablation. **b**, YFP-labelled  $\gamma$ -cells express Pdx1 in control and DT-treated mice. Approximately, half of the  $\gamma$ -cells expressing Pdx1 engage insulin production after  $\beta$ -cell ablation. The experiment was performed once with mice treated asynchronously depending on their availability. Scale bar: 20 $\mu$ m (islet) or 10 $\mu$ m (cell). Insulin: red; YFP: green; Pdx1: white. **c**, Percentage of YFP<sup>+</sup>  $\gamma$ -cells expressing insulin in  $\gamma$ Pdx1 after  $\beta$ -cell loss. Two-tailed Mann-Whitney test (ns  $p > 0.05$ ; \*  $p \leq 0.05$ ; \*\*  $p \leq 0.01$ ; \*\*\*  $p \leq 0.001$ ), DT versus  $\gamma$ Pdx1OE:  $P$  value = 0.0016,  $\gamma$ Pdx1OE versus DT+ $\gamma$ Pdx1OE:  $P$  value = 0.0079, DT versus DT+ $\gamma$ Pdx1OE:  $P$  value = 0.0016. **d**, Percentage of Insulin<sup>+</sup> cells labelled with YFP in  $\gamma$ Pdx1 after  $\beta$ -cell loss. Two-tailed Mann-Whitney test, DT versus  $\gamma$ Pdx1OE:  $P$  value = 0.0016,  $\gamma$ Pdx1OE versus DT+ $\gamma$ Pdx1OE:  $P$  value = 0.0079, DT versus DT+ $\gamma$ Pdx1OE:  $P$  value = 0.0016. DT,  $n=8$  mice, 209 Ins+YFP<sup>+</sup> out of 5477 YFP<sup>+</sup> cells scored (this condition is taken for reference from Fig. 8e-f);  $\gamma$ Pdx1,  $n=5$  mice, 233 Ins+YFP<sup>+</sup> out of 2301 YFP<sup>+</sup> cells scored;  $\gamma$ Pdx1+DT,  $n=5$  mice, 652 Ins+YFP<sup>+</sup> out of 1784 YFP<sup>+</sup> cells scored. Region of the pancreas: Ventral. Data is presented as mean values  $\pm$  s.e.m. Source data are provided as Source Data file (table x).

## Supplementary Table 1

List of primer sequences for qPCR

| <b>Gene</b>    | <b>Primer sequence forward</b> | <b>Primer sequence reverse</b> |
|----------------|--------------------------------|--------------------------------|
| <i>B-actin</i> | 5' AAGCCAACCGTGAAAAGAT 3'      | 5' GTGGTACGACCAGAGGGATAC 3'    |
| <i>Gapdh</i>   | 5' TCCATGACAACCTTTGGCATTG 3'   | 5' CAGTCTTCTGGGTGGCAGTGA 3'    |
| <i>Ppy</i>     | 5' GAGCTGAAGGCAGGGAGC 3'       | 5' GTTTGCAAGGGAGCAGGTTG 3'     |
| <i>Cre</i>     | 5' GCCGCGCGAGATATGG 3'         | 5' GCCACCAGCTTGCATGATC 3'      |
| <i>GFP</i>     | 5' CTACCCCGACCACATGAAGC 3'     | 5' GTAGTTGCCGTCGTCCTTGA 3'     |
| <i>Pyy</i>     | 5' CGCAGCTCTGTTCTCCAAC 3'      | 5' CAAACCTTCTGGCCGAGACC 3'     |

## Supplementary Table 2

List of antibodies used for immunofluorescence

| Primary antibodies              | Dilution | Company                              |
|---------------------------------|----------|--------------------------------------|
| guinea pig anti-Pdx1            | 1/750    | C.W. Wright                          |
| guinea pig anti-porcine insulin | 1/400    | DAKO (A0564)                         |
| rabbit anti-insulin             | 1/3000   | Molecular Probes (701265)            |
| mouse anti-glucagon             | 1/1000   | Sigma (G2654)                        |
| rabbit anti-glucagon            | 1/200    | DAKO (A0565)                         |
| mouse anti-somatostatin         | 1/200    | BCBC Ab1985                          |
| rabbit anti-somatostatin        | 1/200    | DAKO (A0566)                         |
| goat anti-somatostatin*         | 1/200    | Santa Cruz Biotechnology (sc-55565)* |
| rabbit anti-GFP                 | 1/400    | Molecular Probes (A11122)            |
| chicken anti-GFP                | 1/500    | Abcam (ab13970)                      |
| mouse anti-Ppy                  | 1/200    | Y. Fujitani                          |
| mouse anti-Ppy                  | 1/1000   | R&D Biosystems (MAB62971)            |
| mouse anti-Pyy                  | 1/1000   | Abcam (ab112474)                     |
| rabbit anti-Chga                | 1/200    | Abcam (ab68271)                      |
| rabbit anti-lapp                | 1/500    | Abcam (ab254259)                     |

\* Out of stock

| Secondary antibodies | Dilution | Company          |
|----------------------|----------|------------------|
| Alexa 568            | 1/500    | Molecular Probes |
| Alexa 488            | 1/500    | Molecular Probes |
| Alexa 647            | 1/500    | Molecular Probes |
| Alexa 405            | 1/500    | Molecular Probes |
| Cy3                  | 1/500    | Southern Biotech |
| Cy5                  | 1/500    | Southern Biotech |
| FITC                 | 1/500    | Southern Biotech |
| TRITC                | 1/500    | Southern Biotech |
